# Supplementary material for: Adipocyte mesenchymal transition contributes to mammary tumor progression
Source: PubMed Central journal article supplement — Cell Rep. Author manuscript; Available in PMC 2022 Oct 5. (PMC9533474; doi:10.1016/j.celrep.2022.111362), 2022-09-13
Supplement: NIHMS1836252-supplement-1.pdf [file NIHMS1836252-supplement-1.pdf]

Cell Reports, Volume 40

## Supplemental information

### Adipocyte mesenchymal transition

#### contributes to mammary tumor progression

**Qingzhang Zhu, Yi Zhu, Chelsea Hepler, Qianbin Zhang, Jiyoung Park, Christy Gliniak, Gervaise H. Henry, Clair Crewe, Dawei Bu, Zhuzhen Zhang, Shangang Zhao, Thomas Morley, Na Li, Dae-Seok Kim, Douglas Strand, Yingfeng Deng, Jacob J. Robino, Oleg Varlamov, Ruth Gordillo, Mikhail G. Kolonin, Christine M. Kusminski, Rana K. Gupta, and Philipp E. Scherer**

## **Supplemental information**

### **Adipocyte Mesenchymal Transition Contributes to Mammary Tumor Progression**

Qingzhang Zhu, Yi Zhu, Chelsea Hepler, Qianbin Zhang, Jiyoung Park, Christy Gliniak, Gervaise H. Henry, Clair Crewe, Dawei Bu, Zhuzhen Zhang, Shangang Zhao, Thomas Morley, Na Li, Dae-Seok Kim, Douglas Strand, Yingfeng Deng, Jacob J Robino, Oleg Varlamov, Ruth Gordillo, Mikhail G. Kolonin, Christine M. Kusminski, Rana K. Gupta, and Philipp E. Scherer

## Supplementary Figures

Figure S1. Adipocytes undergo de-differentiation during mammary tumor infiltration into the stroma

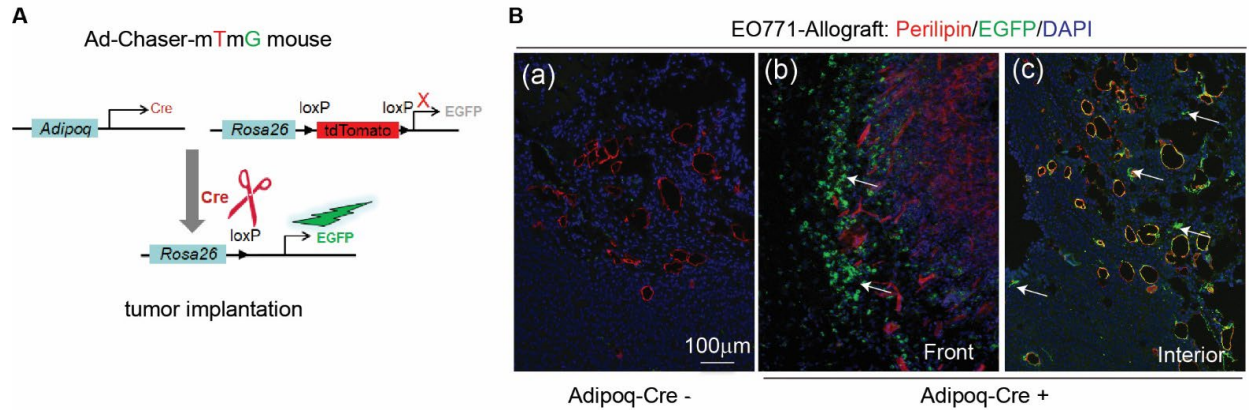

**Figure. S1. Adipocytes undergo de-differentiation during mammary tumor infiltration into the stroma.**

**Related to Figure 1.** (A) Adipocyte lineage tracing scheme of dox-independent Ad-Chaser-mTmG mice used for tumor implantation. (B) Growth of ectopic tumor allograft results in mammary adipocyte de-differentiation in Ad-Chaser-mTmG mice (n=3). No EGFP<sup>+</sup> cells are present in tumors from Adipoq-Cre<sup>-</sup> mice (a). Arrows indicate de-differentiated EGFP<sup>+</sup>/Perilipin<sup>-</sup> cells with fibroblast-like morphology in tumor invasive front (b) and in the core area (c). Scale bar, 100  $\mu$ m.

**Figure S2. Single-cell RNA-sequencing reveals adipocyte mesenchymal transition during mammary tumor progression**

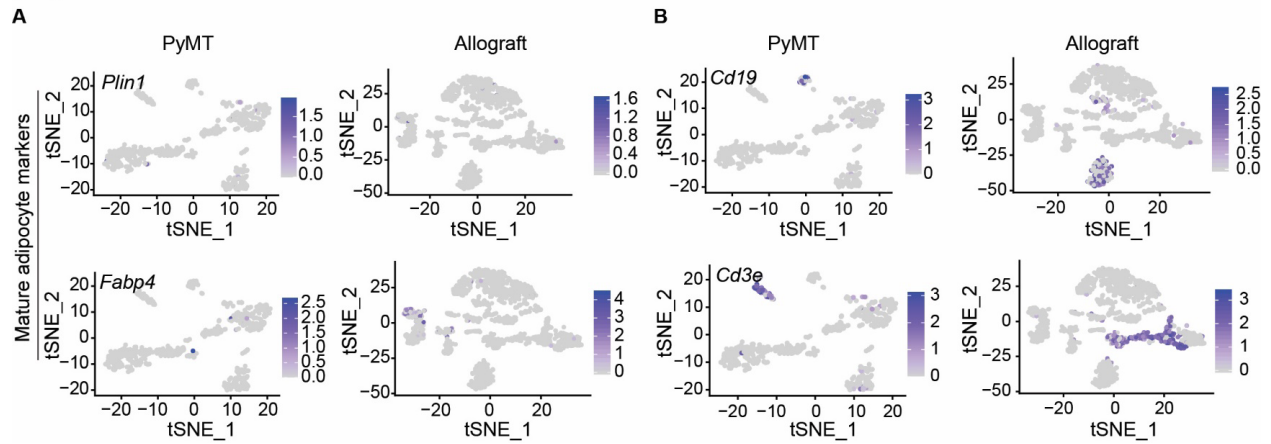

**Figure. S2. Single cell-RNA sequencing reveals adipocyte mesenchymal transition during mammary tumor progression. Related to Figure 2. (A) None/few de-differentiated adipocytes express mature adipocyte markers. (B) Small populations of de-differentiated adipocytes are positive with specific cell markers of T cells and B cells.**

**Figure S3. Mammary tumor-induced de-differentiated adipocytes contribute to tumor microenvironment concerning inflammation and extracellular matrix remodeling**

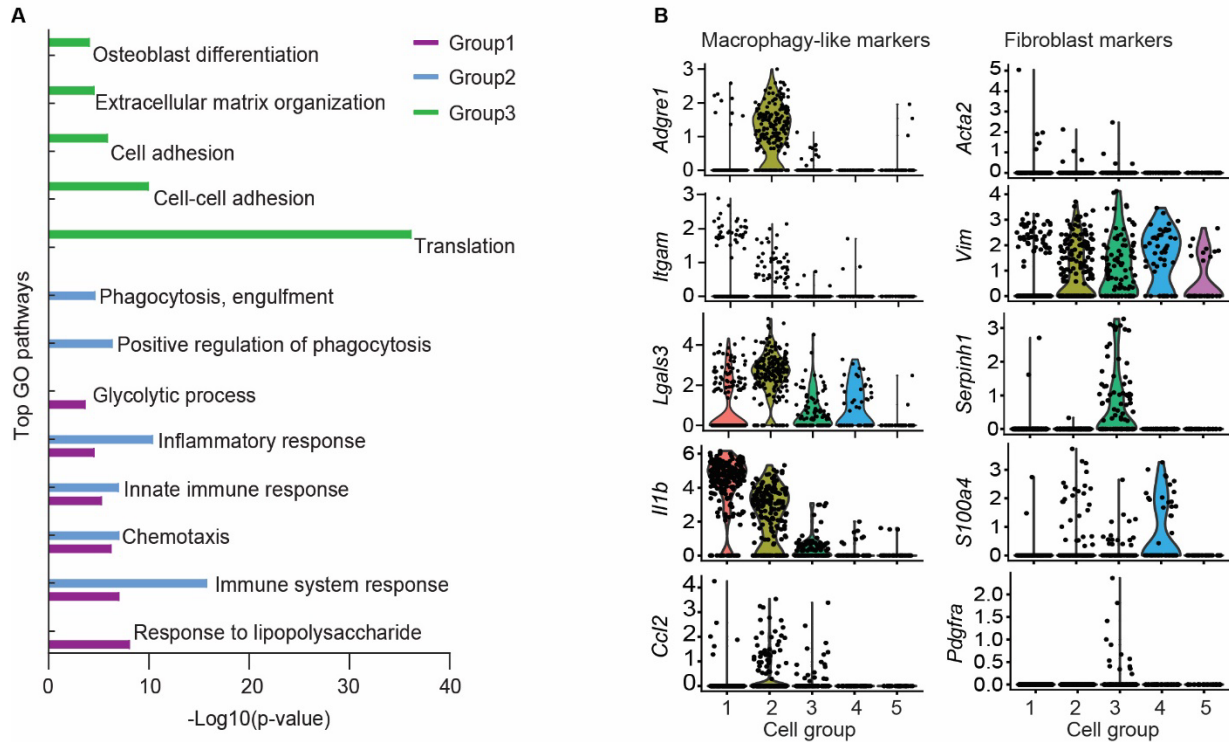

**Figure. S3. Mammary tumor-induced de-differentiated adipocytes contribute to tumor microenvironment concerning inflammation and extracellular matrix remodeling. Related to Figure 3.** (A) Gene ontology (GO) pathway enrichment analysis reveals de-differentiated adipocytes from AdipoChaser-PyMT tumor are likely involved in the processes of ECM remodeling, and inflammatory and immune response. (B) Individual violin plots showing the expression levels and distribution of representative macrophage and fibroblast markers genes. The y axis is the log-scale normalized read count.

**Figure S4. Tumor induced de-differentiated adipocytes display adipogenesis and myogenesis in vitro**

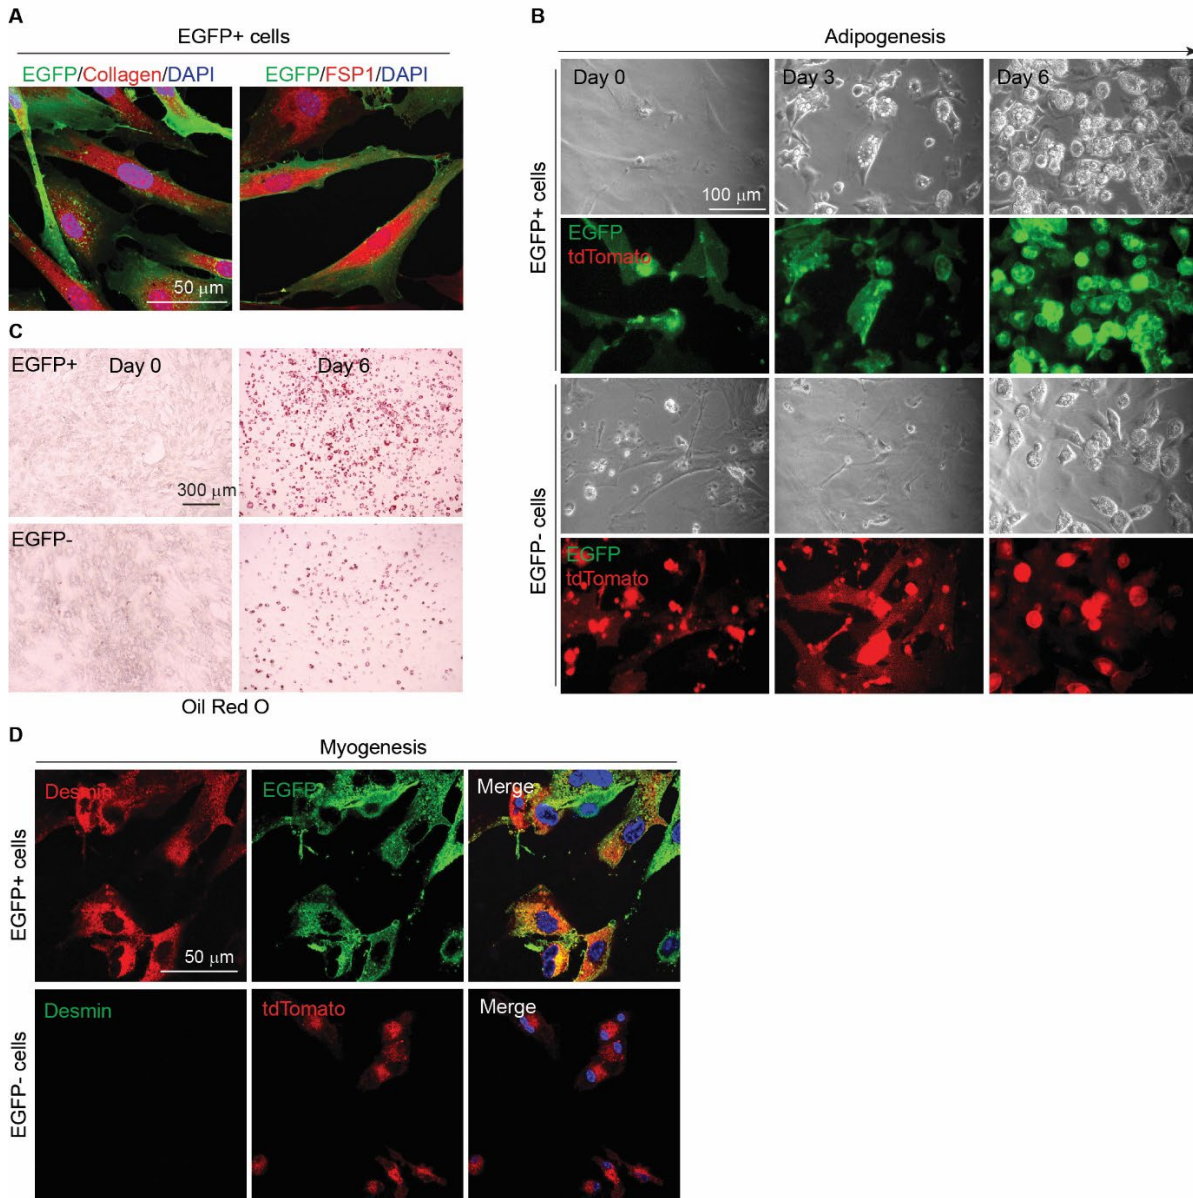

**Figure. S4. Tumor induced de-differentiated adipocytes display adipogenesis and myogenesis in vitro. Related to Figure 3.** (A) De-differentiated cells (EGFP<sup>+</sup>, tdTomato<sup>-</sup>) isolated from AdipoChaser-PyMT-tumor display fibroblast morphology and produce collagen and express fibroblast marker FSP1, Scale bar, 50  $\mu$ m. (B) These EGFP<sup>+</sup> cells are more prone to re-differentiate to mature adipocytes (upper panel) as compared to tumor-associated fibroblasts (EGFP<sup>-</sup>, tdTomato<sup>+</sup>; lower panel). Scale bar, 100  $\mu$ m. (C) Oil Red O staining at day 6 of adipogenic process. Scale bar, 300  $\mu$ m. (D) Upon myogenic induction, these EGFP<sup>+</sup> cells are able to differentiate to Desmin<sup>+</sup> muscle-like cells, while EGFP<sup>-</sup> cells are not. Scale bar, 50  $\mu$ m.

**Table S1. Statistical analysis of histological images of each patient sample. Related to Figure 1 and Figure 3.** ‘Far’ adipocytes (> 500  $\mu\text{m}$  away from tumor lesion) and ‘adjacent (adj)’ adipocytes (within 500  $\mu\text{m}$  surrounding tumor lesion) were analyzed.

| Patient ID | Mean Adipocyte Area ( $\mu\text{m}^2$ ) | Adipocyte Count | Mean Thickness ( $\mu\text{m}$ ) | Mean Highest observed Thickness ( $\mu\text{m}$ ) | Mean Median Thickness ( $\mu\text{m}$ ) | Fibrotic Fraction | Analytic Area ( $\mu\text{m}^2$ ) | Fibrotic Area ( $\mu\text{m}^2$ ) |
|------------|-----------------------------------------|-----------------|----------------------------------|---------------------------------------------------|-----------------------------------------|-------------------|-----------------------------------|-----------------------------------|
| 13032-far  | 2898.4                                  | 561.0           | 16.4                             | 43.6                                              | 11.8                                    | 0.3               | 1586777                           | 471632.2                          |
| 13049-far  | 2917.5                                  | 458.0           | 32.0                             | 101.9                                             | 19.1                                    | 0.5               | 1586777                           | 759989.7                          |
| 13077-far  | 3805.7                                  | 172.0           | 12.0                             | 31.3                                              | 8.7                                     | 0.2               | 1586777                           | 335797.2                          |
| 13152-far  | 2676.8                                  | 332.0           | 17.6                             | 49.7                                              | 11.9                                    | 0.3               | 1586777                           | 501546.7                          |
| 13106-far  | 4561.5                                  | 313.0           | 22.5                             | 71.4                                              | 13.7                                    | 0.3               | 1586777                           | 471466.1                          |
| 12867-far  | 3118.9                                  | 175.0           | 9.3                              | 25.5                                              | 6.6                                     | 0.2               | 1586777                           | 251260.3                          |
| 12882-far  | 4412.6                                  | 126.0           | 20.5                             | 61.8                                              | 13.0                                    | 0.3               | 1586777                           | 477808.2                          |
| 13109-far  | 4708.8                                  | 124.0           | 12.4                             | 33.7                                              | 8.9                                     | 0.2               | 1586777                           | 302115.5                          |
| 12953-far  | 2681.0                                  | 336.0           | 19.7                             | 55.1                                              | 13.2                                    | 0.4               | 1586777                           | 558647.3                          |
| 13032-adj  | 1029.2                                  | 934.0           | 34.5                             | 111.6                                             | 21.4                                    | 0.7               | 1586777                           | 1057292.4                         |
| 13049-adj  | 1220.7                                  | 350.0           | 62.7                             | 197.5                                             | 38.7                                    | 0.8               | 1586777                           | 1182414.8                         |
| 13077-adj  | 1368.6                                  | 343.0           | 81.8                             | 256.1                                             | 49.7                                    | 0.7               | 1586777                           | 1143331.8                         |
| 13152-adj  | 1014.6                                  | 176.0           | 81.7                             | 234.7                                             | 55.6                                    | 0.8               | 1586777                           | 1193260.5                         |
| 13106-adj  | 2258.1                                  | 230.0           | 108.0                            | 316.0                                             | 72.9                                    | 0.6               | 1586777                           | 945440.2                          |
| 12867-adj  | 1860.5                                  | 410.0           | 63.5                             | 190.6                                             | 42.5                                    | 0.7               | 1586777                           | 1080189.8                         |
| 12882-adj  | 1469.0                                  | 1156.0          | 28.1                             | 90.3                                              | 17.3                                    | 0.5               | 1586777                           | 793603.1                          |
| 13109-adj  | 2223.8                                  | 25.0            | 47.3                             | 143.4                                             | 30.6                                    | 0.7               | 1586777                           | 1141760.8                         |
| 12953-adj  | 1786.3                                  | 317.0           | 24.5                             | 77.3                                              | 15.5                                    | 0.5               | 1586777                           | 803390.4                          |

**Table S2. Characteristics of tumor samples from patients. Related to Figure 1.**

| <b>Patient ID</b> | <b>Tumor subtype</b> |     |       | <b>Tumor site</b> | <b>Tumor form</b>         |
|-------------------|----------------------|-----|-------|-------------------|---------------------------|
| 13032             | PR+                  | ER+ | Her2- | Left              | Invasive ductal carcinoma |
| 13049             | PR+                  | ER+ | Her2- | Left              | Invasive ductal carcinoma |
| 13077             | PR+                  | ER+ | Her2- | Left              | Invasive ductal carcinoma |
| 13152             | PR+                  | ER+ | Her2- | Left              | Invasive ductal carcinoma |
| 13106             | PR+                  | ER+ | Her2- | Right             | Invasive ductal carcinoma |
| 12867             | PR-                  | PR- | Her2- | Left              | Invasive ductal carcinoma |
| 12882             | PR-                  | PR- | Her2- | Right             | Invasive ductal carcinoma |
| 13109             | PR+                  | ER+ | Her2+ | Left              | Invasive ductal carcinoma |
| 12953             | BRCA1 mutation       |     |       | Right             | Invasive ductal carcinoma |



**Table S3. Metabolic features of Ad-Xbp1s mice on chow-fed conditions. Related to Figure 5.** Data presented as mean  $\pm$  SEM, n=5 per genotype. Unpaired Student's t test was used for comparisons between genotypes. \* p<0.05; \*\* p<0.01. NEFA, non-esterified fatty acids.

| Parameters                | WT              |                 | Ad-Xbp1s         |                  |
|---------------------------|-----------------|-----------------|------------------|------------------|
|                           | Fed             | Fasted          | Fed              | Fasted           |
| Body weight (g)           | 26.1 $\pm$ 0.9  |                 | 23.3 $\pm$ 0.7*  |                  |
| Glucose (mg/dL)           | 164.9 $\pm$ 3.8 | 83.2 $\pm$ 4.1  | 186.0 $\pm$ 6.5* | 101.2 $\pm$ 4.2* |
| Insulin (ng/ml)           | 0.9 $\pm$ 0.2   | 0.4 $\pm$ 0.1   | 0.8 $\pm$ 0.1    | 0.5 $\pm$ 0.1    |
| NEFA (mM)                 | 0.59 $\pm$ 0.05 | 0.78 $\pm$ 0.06 | 0.73 $\pm$ 0.03* | 0.89 $\pm$ 0.06  |
| Triglyceride (mg/dL)      | 82.9 $\pm$ 11.9 | 61.1 $\pm$ 5.6  | 83.5 $\pm$ 11.9  | 45.1 $\pm$ 3.4*  |
| Cholesterol (mg/dL)       | 92.5 $\pm$ 3.1  | 84.2 $\pm$ 2.4  | 94.9 $\pm$ 5.4   | 91.4 $\pm$ 6.0   |
| Adiponectin ( $\mu$ g/ml) | 3.8 $\pm$ 0.3   | 3.2 $\pm$ 0.3   | 1.0 $\pm$ 0.1**  | 0.8 $\pm$ 0.1**  |
| Leptin (ng/ml)            | 8.1 $\pm$ 1.2   | 1.6 $\pm$ 0.3   | 4.3 $\pm$ 0.8*   | 1.5 $\pm$ 0.5    |

**Table S4. Quantitative PCR primer list. Related to STAR Methods.**

| <b>Gene name</b> | <b>Protein name</b>                                         | <b>Forward 5'-3'</b>    | <b>Reverse 5'-3'</b>    |
|------------------|-------------------------------------------------------------|-------------------------|-------------------------|
| <i>Adipoq</i>    | Adiponectin                                                 | TGTCCTCTTAATCCTGCCCA    | CCAACCTGCACAAGTTCCTT    |
| <i>Lep</i>       | Leptin                                                      | GCGGTTGGATGGACTAGGAT    | TTCGTCAGGGGCTTCCAAAG    |
| <i>Pparg 2</i>   | Peroxisome proliferator-activated receptor gamma, isoform 2 | GCATGGTGCCTTCGCTGA      | TGGCATCTCTGTGTCAACATG   |
| <i>Plin1</i>     | Perilipin 1                                                 | TACCTAGCTGCTTTCTCGGTG   | GTGGGCTTCTTTGGTGCTGT    |
| <i>Coll1a1</i>   | Collagen, type I, alpha 1                                   | AGATGATGGGGAAGCTGGCAA   | AAGCCTCGGTGTCCCTTCATT   |
| <i>Col3a1</i>    | Collagen, type III, alpha 1                                 | CTGTAACATGGAAACTGGGGAAA | CCATAGCTGAACTGAAAACCACC |
| <i>Col4a1</i>    | Collagen, type IV, alpha 1                                  | CTGGCACAAAAGGGACGAG     | ACGTGGCCGAGAATTTCCACC   |
| <i>Col8a1</i>    | Collagen, type VIII, alpha 1                                | ACTCTGTCAGACTCATTCAAGGC | CAAAGGCATGTGAGGGACTTG   |
| <i>Tgfb1</i>     | Transforming growth factor, beta 1                          | CTCCCGTGGCTTCTAGTGC     | GCCTTAGTTTGGACAGGATCTG  |
| <i>Il6</i>       | Interleukin 6                                               | CCGGAGAGGAGACTTCACAG    | CAGAATTGCCATTGCACAAC    |
| <i>Il1b</i>      | Interleukin 1 beta                                          | GCAACTGTTCTGAACTCAACT   | ATCTTTTGGGGTCCGTCAACT   |
| <i>Ccl2</i>      | Monocyte chemoattractant protein 1                          | AGCACCAGCCAACTCTCAC     | TCTGGACCCATTCTTCTTG     |
| <i>Cxcl2</i>     | C-X-C motif chemokine ligand 2                              | ACTAGCTACATCCCACCCACAC  | GCACACTCCTTCCATGAAAGCC  |
| <i>Cxcl10</i>    | C-X-C motif chemokine ligand 10                             | CTCAGGCTCGTCAGTTCTAAGT  | CCCTTGGGAAGATGGTGGTTAA  |
| <i>Cxcl14</i>    | C-X-C motif chemokine ligand 14                             | TGGACGGGTCCAAGTGTAAGT   | TCCTCGCAGTGTGGGTACTTT   |
| <i>Rps16</i>     | 40S ribosomal protein S16                                   | GATTTGCTGGTGTGGATATT    | TCTTTGATCTCCTTCTTGGA    |
| <i>Rps18</i>     | 40S ribosomal protein S18                                   | CTGGTTGATCCTGCCAGTAG    | CGACCAAAGGAACCATAACT    |
